# Supplementary material for: Synthesis of near-infrared absorbing and fluorescing thiophene-fused BODIPY dyes with strong electron-donating groups and their application in dye-sensitised solar cells
Source: Royal Society of Chemistry journal article supplement (doi:10.1039/c8nj04672g), 2018-11-26
Supplement: c8nj04672g1.pdf [file c8nj04672g1.pdf]

## *Supporting information*

### **Synthesis of Near-Infrared Absorbing and Fluorescing Thiophene-Fused BODIPY Dyes with Strong Electron-Donating Groups and Their Application in Dye-Sensitised Solar Cells**

Yasuhiro Kubota,<sup>a,\*</sup> Kosei Kimura,<sup>a</sup> Jiye Jin,<sup>b</sup> Kazuhiro Manseki,<sup>a</sup> Kazumasa Funabiki<sup>a</sup> and Masaki Matsui<sup>a,\*</sup>

*<sup>a</sup>Department of Materials Science and Technology, Faculty of Engineering, Gifu University,  
Yanagido, Gifu, 501-1193, Japan*

*<sup>b</sup>Department of Chemistry, Faculty of Science, Shinshu University, 3-1-1, Asahi, Matsumoto,  
Nagano, 390-8621, Japan.*

## **Contents**

1. The fluorescence decay curves of **5** and **6** in dichloromethane.
2. Normalized absorption and fluorescence spectra of **5** and **6** in dichloromethane.
3. I-V curve and IPCE spectrum of **D149**.
4. Cartesian coordinates of **5** and **6**
5. <sup>1</sup>H and <sup>13</sup>C NMR spectra (Figure S4–Figure S11)

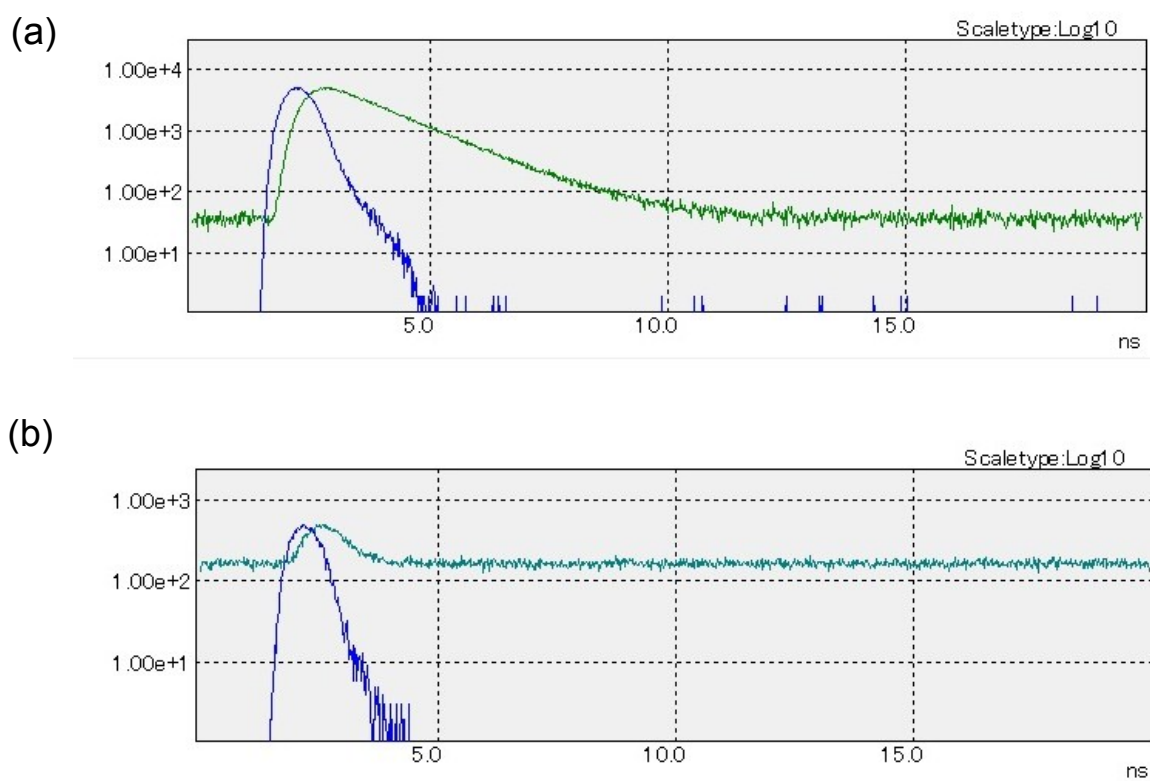

**Figure S1.** The fluorescence decay curves of (a) **5** and (b) **6** in dichloromethane.

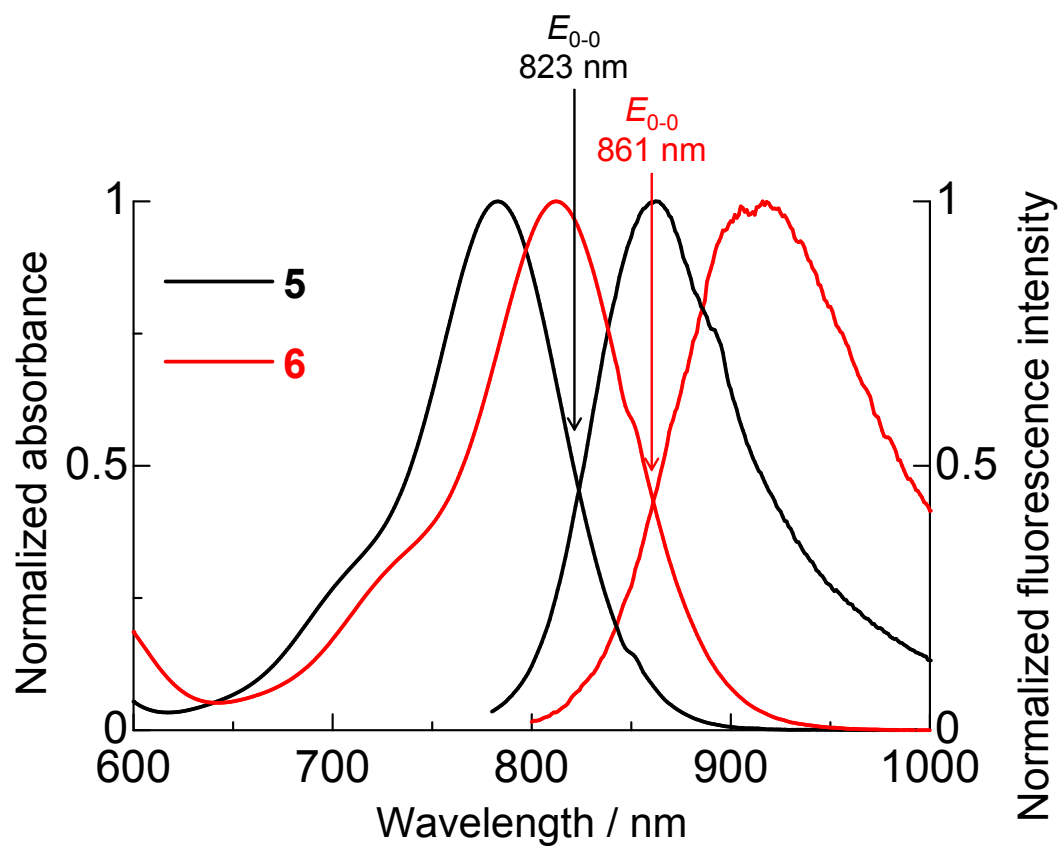

**Figure S2.** Normalized absorption and fluorescence spectra in dichloromethane.

(a)

(b)

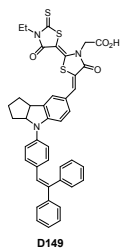

**Figure S3.** (a) I-V curve and (b) IPCE spectrum of **D149**.

Cartesian coordinate of **5**.

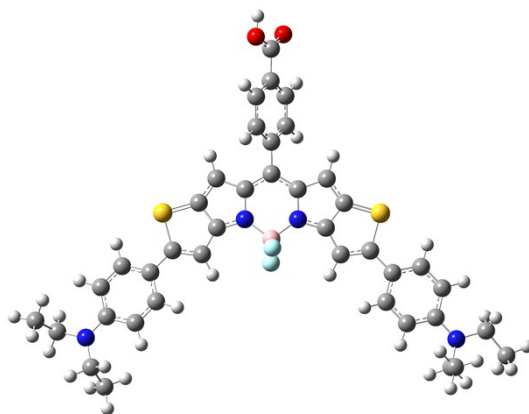

|     |           |          |           |
|-----|-----------|----------|-----------|
| C 0 | -1.292004 | 2.411991 | 0.134687  |
| N 0 | -1.269038 | 1.019452 | 0.211271  |
| N 0 | 1.190722  | 1.083698 | 0.108065  |
| C 0 | 1.140905  | 2.478115 | 0.065912  |
| C 0 | -0.095224 | 3.151817 | 0.091704  |
| C 0 | 2.492969  | 0.727441 | 0.036229  |
| C 0 | 3.303792  | 1.894502 | -0.050892 |
| C 0 | 2.471114  | 2.998225 | -0.020323 |

|     |           |           |           |
|-----|-----------|-----------|-----------|
| C 0 | 3.212630  | -0.488183 | 0.013629  |
| C 0 | 4.573822  | -0.278194 | -0.082618 |
| S 0 | 4.994427  | 1.463962  | -0.146877 |
| C 0 | -2.645194 | 2.857361  | -0.003456 |
| C 0 | -3.418423 | 1.711641  | -0.001978 |
| C 0 | -2.548572 | 0.591213  | 0.128692  |
| S 0 | -5.081339 | 1.189290  | -0.122250 |
| C 0 | -4.570471 | -0.526962 | -0.013373 |
| C 0 | -3.201733 | -0.661308 | 0.113768  |
| C 0 | -5.573026 | -1.579316 | -0.056219 |
| C 0 | 5.630295  | -1.277482 | -0.127365 |
| B 0 | -0.003588 | 0.153193  | 0.482449  |
| F 0 | 0.066672  | -0.193526 | 1.824692  |
| F 0 | -0.010682 | -0.980747 | -0.319713 |
| C 0 | 5.385201  | -2.613081 | 0.252988  |
| C 0 | 6.372203  | -3.581678 | 0.210430  |
| C 0 | 7.688837  | -3.283897 | -0.226842 |
| C 0 | 7.941220  | -1.935609 | -0.580665 |
| C 0 | 6.941121  | -0.975558 | -0.537340 |
| C 0 | -6.897294 | -1.345314 | -0.473838 |
| C 0 | -7.848385 | -2.351727 | -0.510683 |
| C 0 | -7.531293 | -3.680443 | -0.133692 |
| C 0 | -6.196814 | -3.918504 | 0.284305  |
| C 0 | -5.260165 | -2.900469 | 0.324680  |
| C 0 | -0.146657 | 4.634214  | 0.038331  |
| C 0 | -0.839349 | 5.356191  | 1.026278  |
| C 0 | -0.893946 | 6.745906  | 0.985917  |

|     |            |           |           |
|-----|------------|-----------|-----------|
| C 0 | -0.259285  | 7.443535  | -0.050275 |
| C 0 | 0.429067   | 6.732683  | -1.042000 |
| C 0 | 0.486309   | 5.344821  | -0.997809 |
| C 0 | -0.287079  | 8.926701  | -0.144630 |
| O 0 | -0.985211  | 9.510434  | 0.862384  |
| N 0 | 8.671294   | -4.263890 | -0.319033 |
| N 0 | -8.472917  | -4.691255 | -0.169270 |
| C 0 | 8.486883   | -5.537808 | 0.378396  |
| C 0 | 10.031224  | -3.847147 | -0.684578 |
| C 0 | -8.182863  | -6.031975 | 0.334417  |
| C 0 | -9.812719  | -4.475164 | -0.710685 |
| C 0 | 8.684771   | -5.465889 | 1.898641  |
| C 0 | 10.997932  | -4.985713 | -1.005153 |
| C 0 | -7.555048  | -6.965098 | -0.708477 |
| C 0 | -10.821256 | -3.947506 | 0.317577  |
| O 0 | 0.249133   | 9.577517  | -1.019461 |
| H 0 | 2.733920   | 4.044125  | -0.055750 |
| H 0 | 2.746704   | -1.463798 | 0.031541  |
| H 0 | -2.956176  | 3.884405  | -0.117562 |
| H 0 | -2.683840  | -1.609370 | 0.158550  |
| H 0 | 4.401072   | -2.895555 | 0.612424  |
| H 0 | 6.111454   | -4.582086 | 0.530064  |
| H 0 | 8.928203   | -1.621768 | -0.891813 |
| H 0 | 7.190545   | 0.037112  | -0.841193 |
| H 0 | -7.194233  | -0.348842 | -0.788175 |
| H 0 | -8.851274  | -2.095718 | -0.827723 |
| H 0 | -5.882776  | -4.912758 | 0.575938  |

|     |            |           |           |
|-----|------------|-----------|-----------|
| H 0 | -4.258940  | -3.135422 | 0.670807  |
| H 0 | -1.318697  | 4.818048  | 1.837114  |
| H 0 | -1.421792  | 7.294073  | 1.757649  |
| H 0 | 0.906194   | 7.287095  | -1.842825 |
| H 0 | 1.003346   | 4.797641  | -1.778770 |
| H 0 | -0.933406  | 10.466488 | 0.698337  |
| H 0 | 9.180927   | -6.261163 | -0.050937 |
| H 0 | 7.491699   | -5.924335 | 0.143285  |
| H 0 | 9.951474   | -3.223724 | -1.580777 |
| H 0 | 10.470550  | -3.209028 | 0.100172  |
| H 0 | -9.126436  | -6.460229 | 0.690092  |
| H 0 | -7.540446  | -5.956042 | 1.217145  |
| H 0 | -10.163249 | -5.432664 | -1.111211 |
| H 0 | -9.751321  | -3.799172 | -1.569251 |
| H 0 | 8.519321   | -6.448840 | 2.352522  |
| H 0 | 7.987584   | -4.757455 | 2.354752  |
| H 0 | 9.701501   | -5.146188 | 2.149413  |
| H 0 | 11.930286  | -4.551980 | -1.378872 |
| H 0 | 10.600612  | -5.644186 | -1.783680 |
| H 0 | 11.250455  | -5.591653 | -0.130624 |
| H 0 | -7.378807  | -7.957178 | -0.279192 |
| H 0 | -6.600161  | -6.571671 | -1.067896 |
| H 0 | -8.215022  | -7.083051 | -1.573821 |
| H 0 | -11.807360 | -3.821283 | -0.142025 |
| H 0 | -10.504939 | -2.982597 | 0.723200  |
| H 0 | -10.925091 | -4.644386 | 1.155332  |

Cartesian coordinate of **6**.

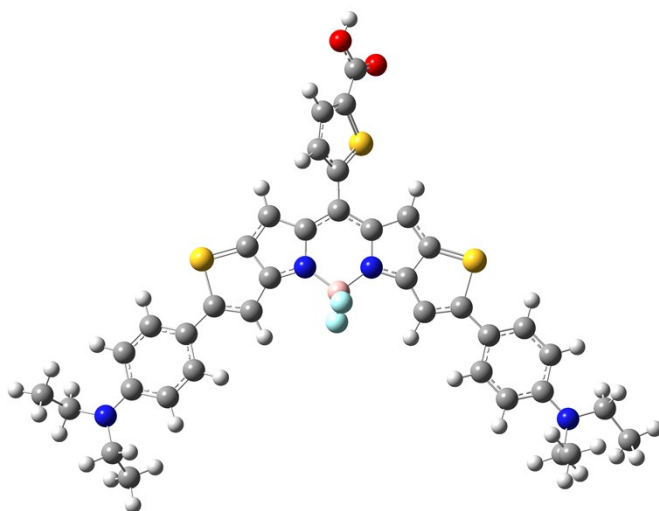

|     |           |           |           |
|-----|-----------|-----------|-----------|
| C 0 | -1.277137 | 2.487431  | 0.339336  |
| N 0 | -1.296693 | 1.095055  | 0.384574  |
| N 0 | 1.159532  | 1.083246  | 0.267949  |
| C 0 | 1.162828  | 2.478755  | 0.278128  |
| C 0 | -0.053769 | 3.191693  | 0.330963  |
| C 0 | 2.446965  | 0.679352  | 0.173869  |
| C 0 | 3.300891  | 1.816701  | 0.122843  |
| C 0 | 2.512700  | 2.949648  | 0.202841  |
| C 0 | 3.118620  | -0.560828 | 0.104845  |
| C 0 | 4.486789  | -0.398703 | 0.004647  |
| S 0 | 4.972989  | 1.327190  | -0.001791 |
| C 0 | -2.614329 | 2.976091  | 0.190748  |
| C 0 | -3.421240 | 1.854303  | 0.156557  |
| C 0 | -2.587186 | 0.706076  | 0.273893  |
| S 0 | -5.096153 | 1.384083  | -0.006569 |
| C 0 | -4.636807 | -0.348432 | 0.066567  |
| C 0 | -3.274641 | -0.525812 | 0.214566  |
| C 0 | -5.666450 | -1.370519 | -0.023760 |

|     |           |           |           |
|-----|-----------|-----------|-----------|
| C 0 | 5.503982  | -1.434142 | -0.086173 |
| C 0 | 5.213434  | -2.772566 | 0.250358  |
| C 0 | 6.163292  | -3.774508 | 0.162153  |
| C 0 | 7.485008  | -3.510024 | -0.281666 |
| C 0 | 7.783767  | -2.160001 | -0.590437 |
| C 0 | 6.820949  | -1.166044 | -0.500742 |
| C 0 | -6.973064 | -1.090971 | -0.468596 |
| C 0 | -7.948529 | -2.070561 | -0.554676 |
| C 0 | -7.675787 | -3.416150 | -0.203097 |
| C 0 | -6.359929 | -3.699378 | 0.244984  |
| C 0 | -5.398489 | -2.708136 | 0.333789  |
| C 0 | -0.087064 | 4.659645  | 0.352323  |
| C 0 | -0.822898 | 5.456445  | 1.211916  |
| C 0 | -0.665771 | 6.840328  | 0.965927  |
| C 0 | 0.182003  | 7.101053  | -0.087993 |
| S 0 | 0.802940  | 5.635657  | -0.791145 |
| C 0 | 0.598711  | 8.390023  | -0.646522 |
| O 0 | 0.023693  | 9.439016  | -0.004511 |
| N 0 | 8.428390  | -4.521669 | -0.422718 |
| N 0 | -8.641027 | -4.400722 | -0.290478 |
| C 0 | 8.210709  | -5.809180 | 0.239527  |
| C 0 | 9.796114  | -4.144524 | -0.802325 |
| C 0 | -8.399750 | -5.760837 | 0.186465  |
| C 0 | -9.957365 | -4.137876 | -0.867932 |
| C 0 | 8.440412  | -5.790347 | 1.756807  |
| C 0 | 10.708273 | -5.307435 | -1.189094 |
| C 0 | -7.762318 | -6.683069 | -0.860346 |



|     |            |           |           |
|-----|------------|-----------|-----------|
| C 0 | -10.984647 | -3.609529 | 0.141288  |
| O 0 | 1.368553   | 8.529156  | -1.577728 |
| B 0 | -0.059998  | 0.185035  | 0.636948  |
| F 0 | 0.006882   | -0.183059 | 1.973527  |
| F 0 | -0.107386  | -0.935955 | -0.181954 |
| H 0 | 2.822283   | 3.982725  | 0.204556  |
| H 0 | 2.615675   | -1.517940 | 0.092580  |
| H 0 | -2.892036  | 4.013040  | 0.085080  |
| H 0 | -2.784798  | -1.489289 | 0.240789  |
| H 0 | 4.223264   | -3.031187 | 0.611202  |
| H 0 | 5.869038   | -4.775474 | 0.449357  |
| H 0 | 8.778466   | -1.871799 | -0.901723 |
| H 0 | 7.104578   | -0.153040 | -0.771578 |
| H 0 | -7.235283  | -0.079716 | -0.766174 |
| H 0 | -8.935826  | -1.780620 | -0.890953 |
| H 0 | -6.080192  | -4.708118 | 0.521233  |
| H 0 | -4.413229  | -2.977485 | 0.700079  |
| H 0 | -1.429580  | 5.043627  | 2.008453  |
| H 0 | -1.144198  | 7.625368  | 1.538272  |
| H 0 | 0.363050   | 10.234688 | -0.446729 |
| H 0 | 8.869997   | -6.543205 | -0.224984 |
| H 0 | 7.198032   | -6.152926 | 0.013183  |
| H 0 | 9.722196   | -3.484112 | -1.671951 |
| H 0 | 10.277682  | -3.555696 | -0.004020 |
| H 0 | -9.364451  | -6.173716 | 0.501011  |
| H 0 | -7.784417  | -5.724196 | 1.090758  |
| H 0 | -10.318554 | -5.076406 | -1.302423 |

|     |            |           |           |
|-----|------------|-----------|-----------|
| H 0 | -9.852219  | -3.443713 | -1.707521 |
| H 0 | 8.249832   | -6.780453 | 2.184447  |
| H 0 | 7.777142   | -5.072808 | 2.247936  |
| H 0 | 9.472349   | -5.513174 | 1.995749  |
| H 0 | 11.647717  | -4.897124 | -1.571398 |
| H 0 | 10.264882  | -5.919871 | -1.980161 |
| H 0 | 10.958087  | -5.955177 | -0.344185 |
| H 0 | -7.624317  | -7.689648 | -0.451318 |
| H 0 | -6.787069  | -6.305378 | -1.179645 |
| H 0 | -8.397133  | -6.762910 | -1.748580 |
| H 0 | -11.952311 | -3.447529 | -0.345452 |
| H 0 | -10.657757 | -2.662826 | 0.580066  |
| H 0 | -11.131828 | -4.323403 | 0.957954  |

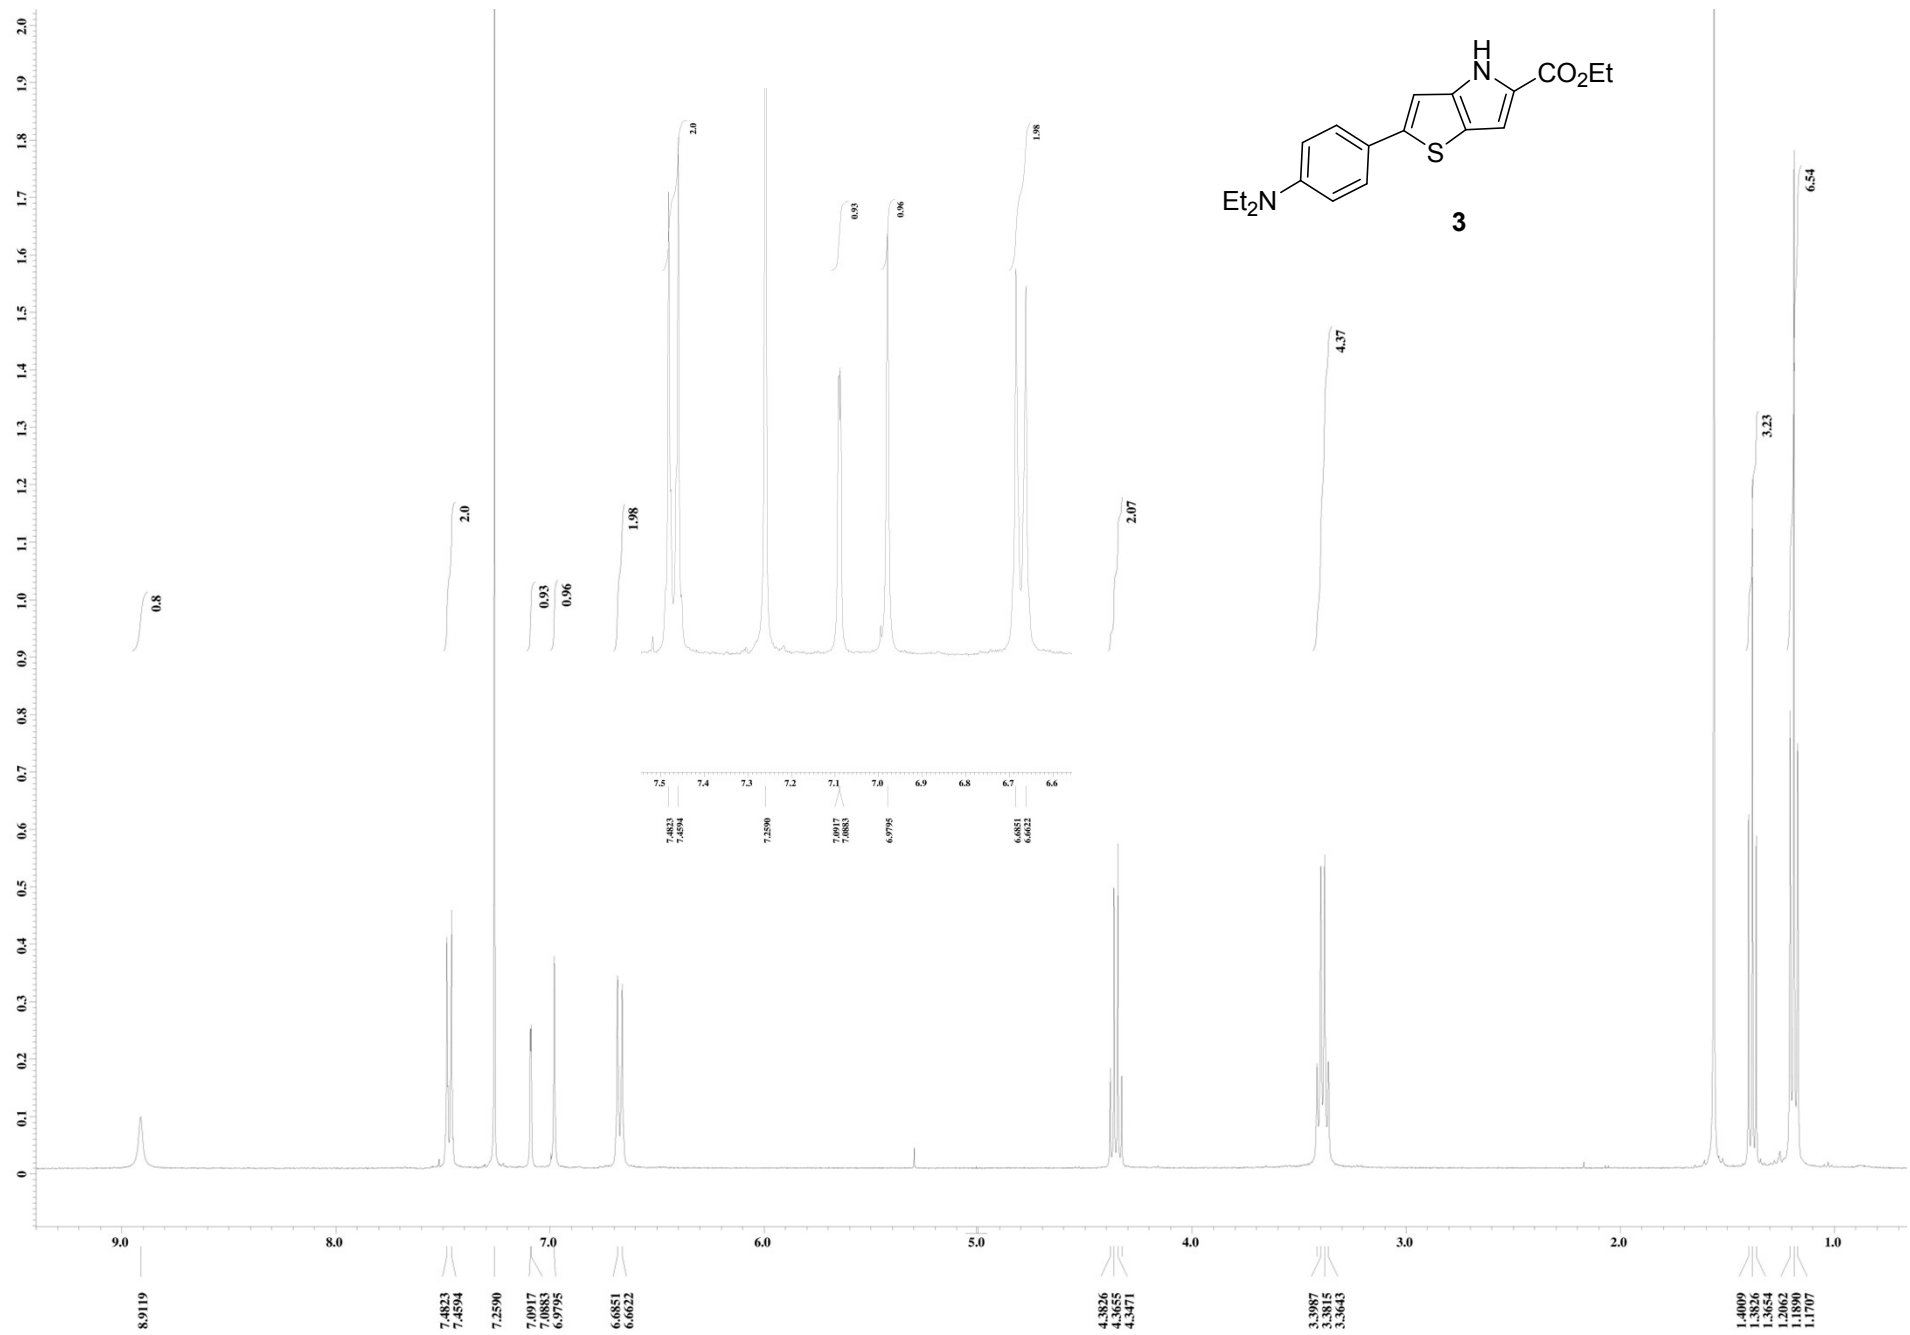

Figure S4. <sup>1</sup>H NMR spectrum of **3** (400 MHz, CDCl<sub>3</sub>).

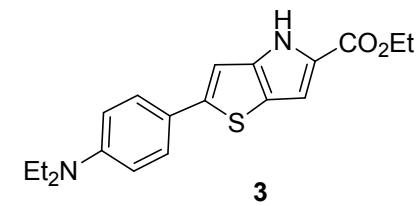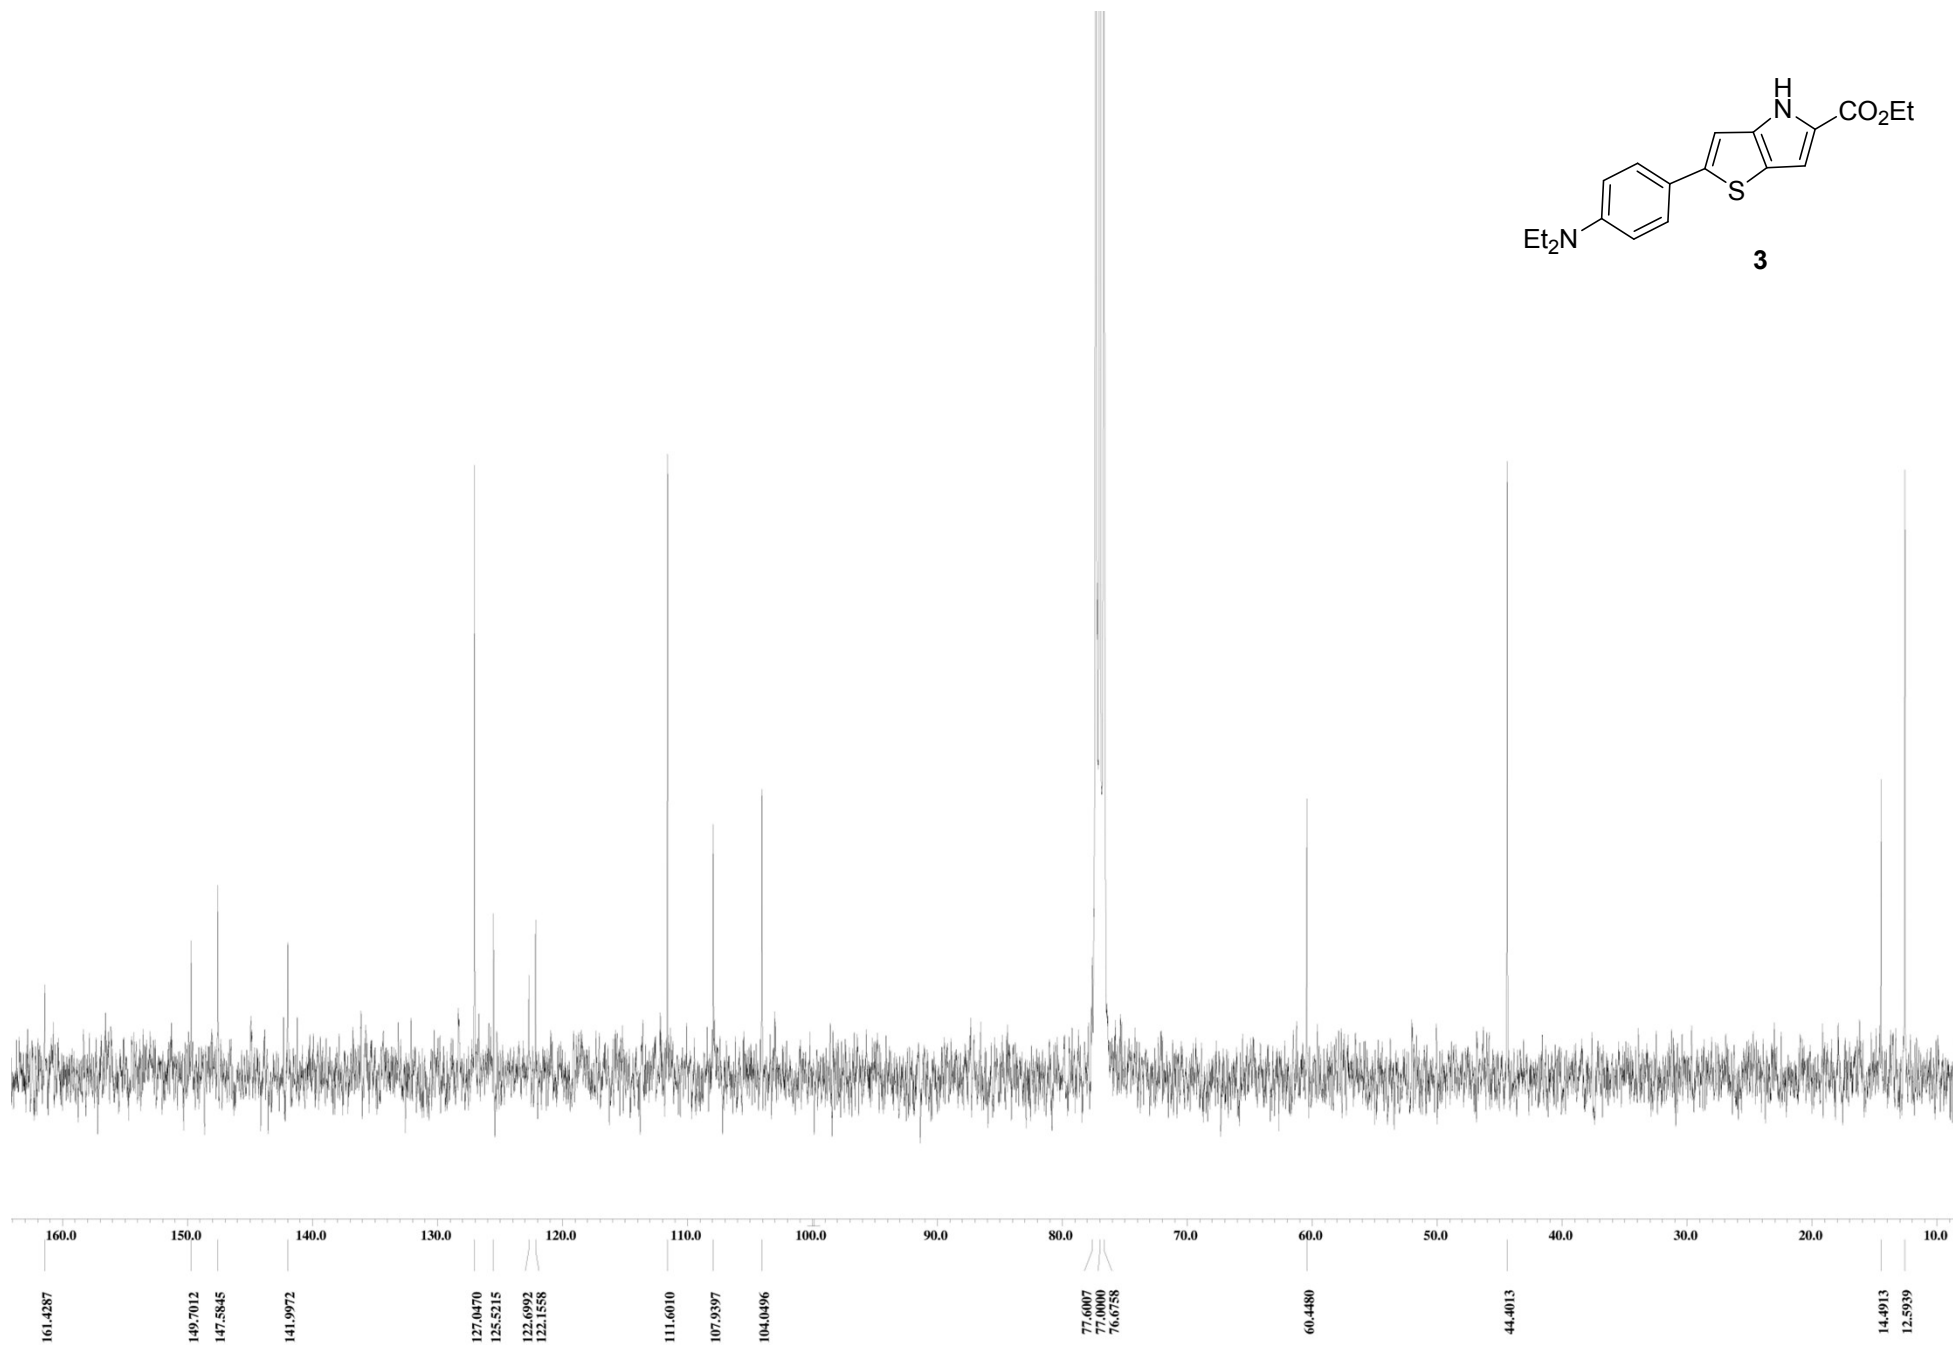

**Figure S5.**  $^{13}\text{C}$  NMR spectrum of **3** (100 MHz,  $\text{CDCl}_3$ ).

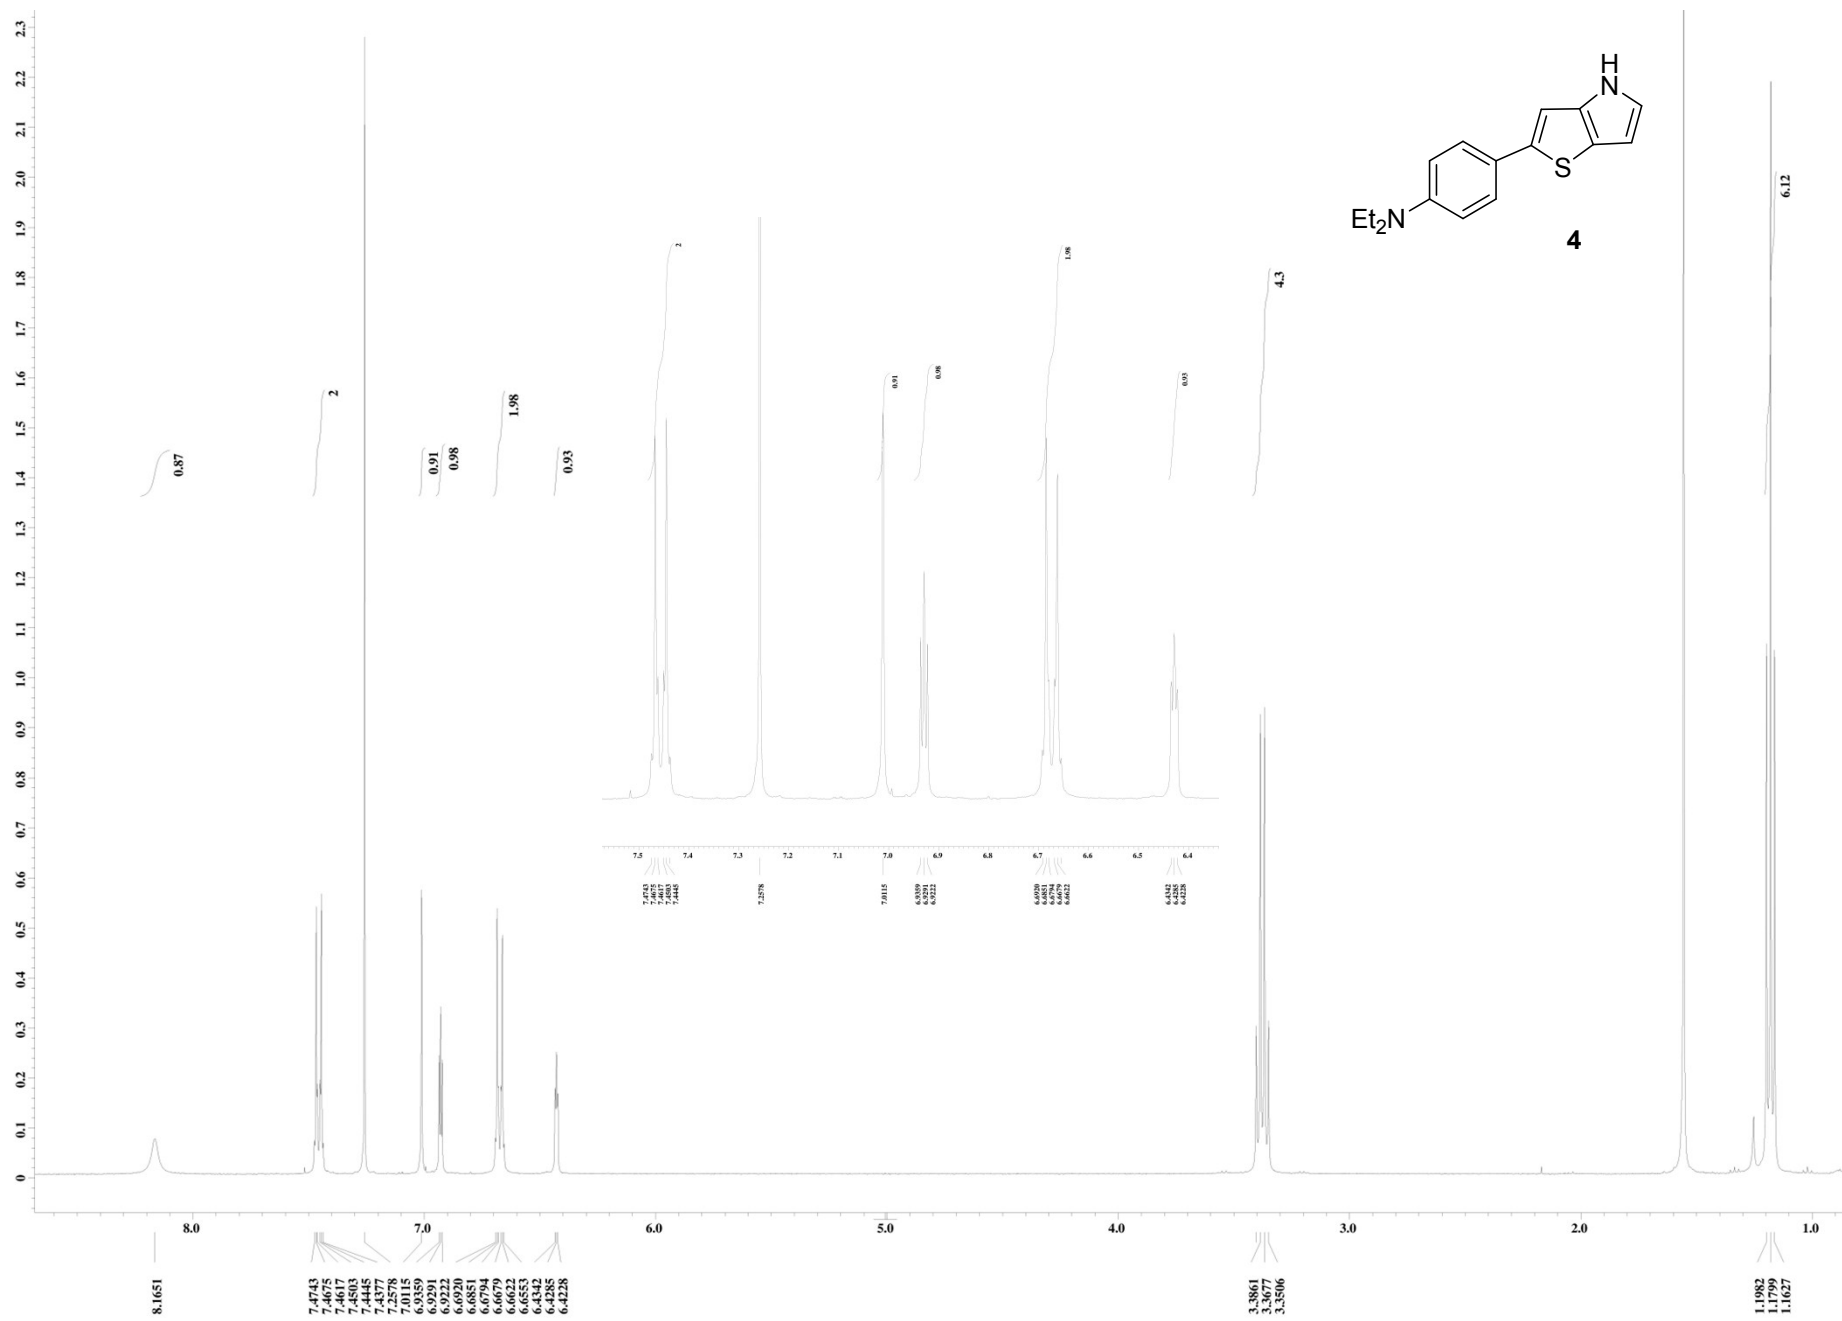

Figure S6 <sup>1</sup>H NMR spectrum of 4 (400 MHz, CDCl<sub>3</sub>).

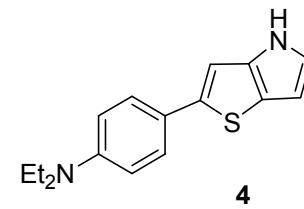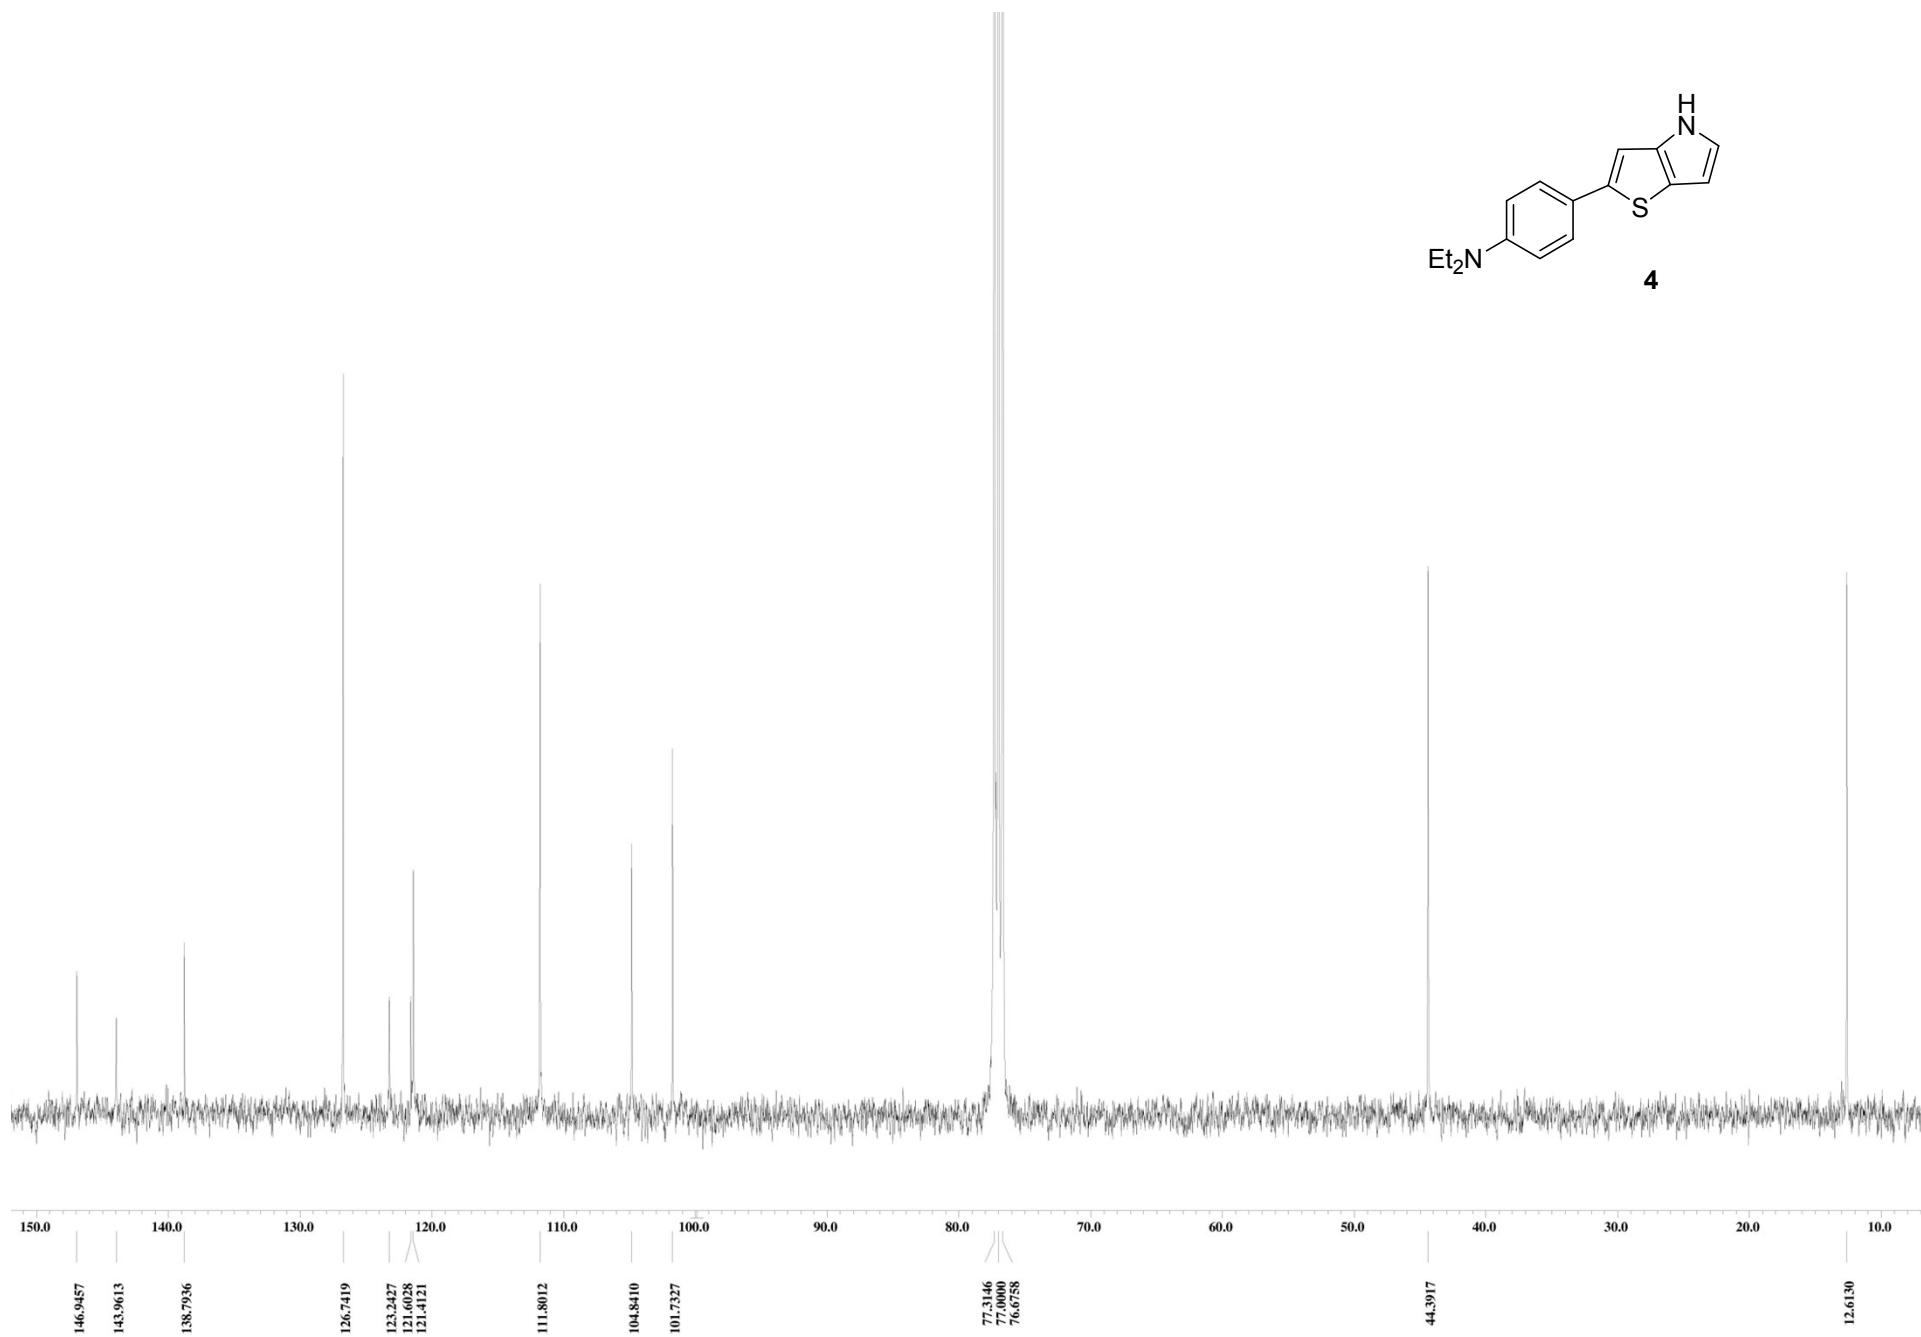

**Figure S7.** <sup>13</sup>C NMR spectrum of **4** (100 MHz, CDCl<sub>3</sub>).

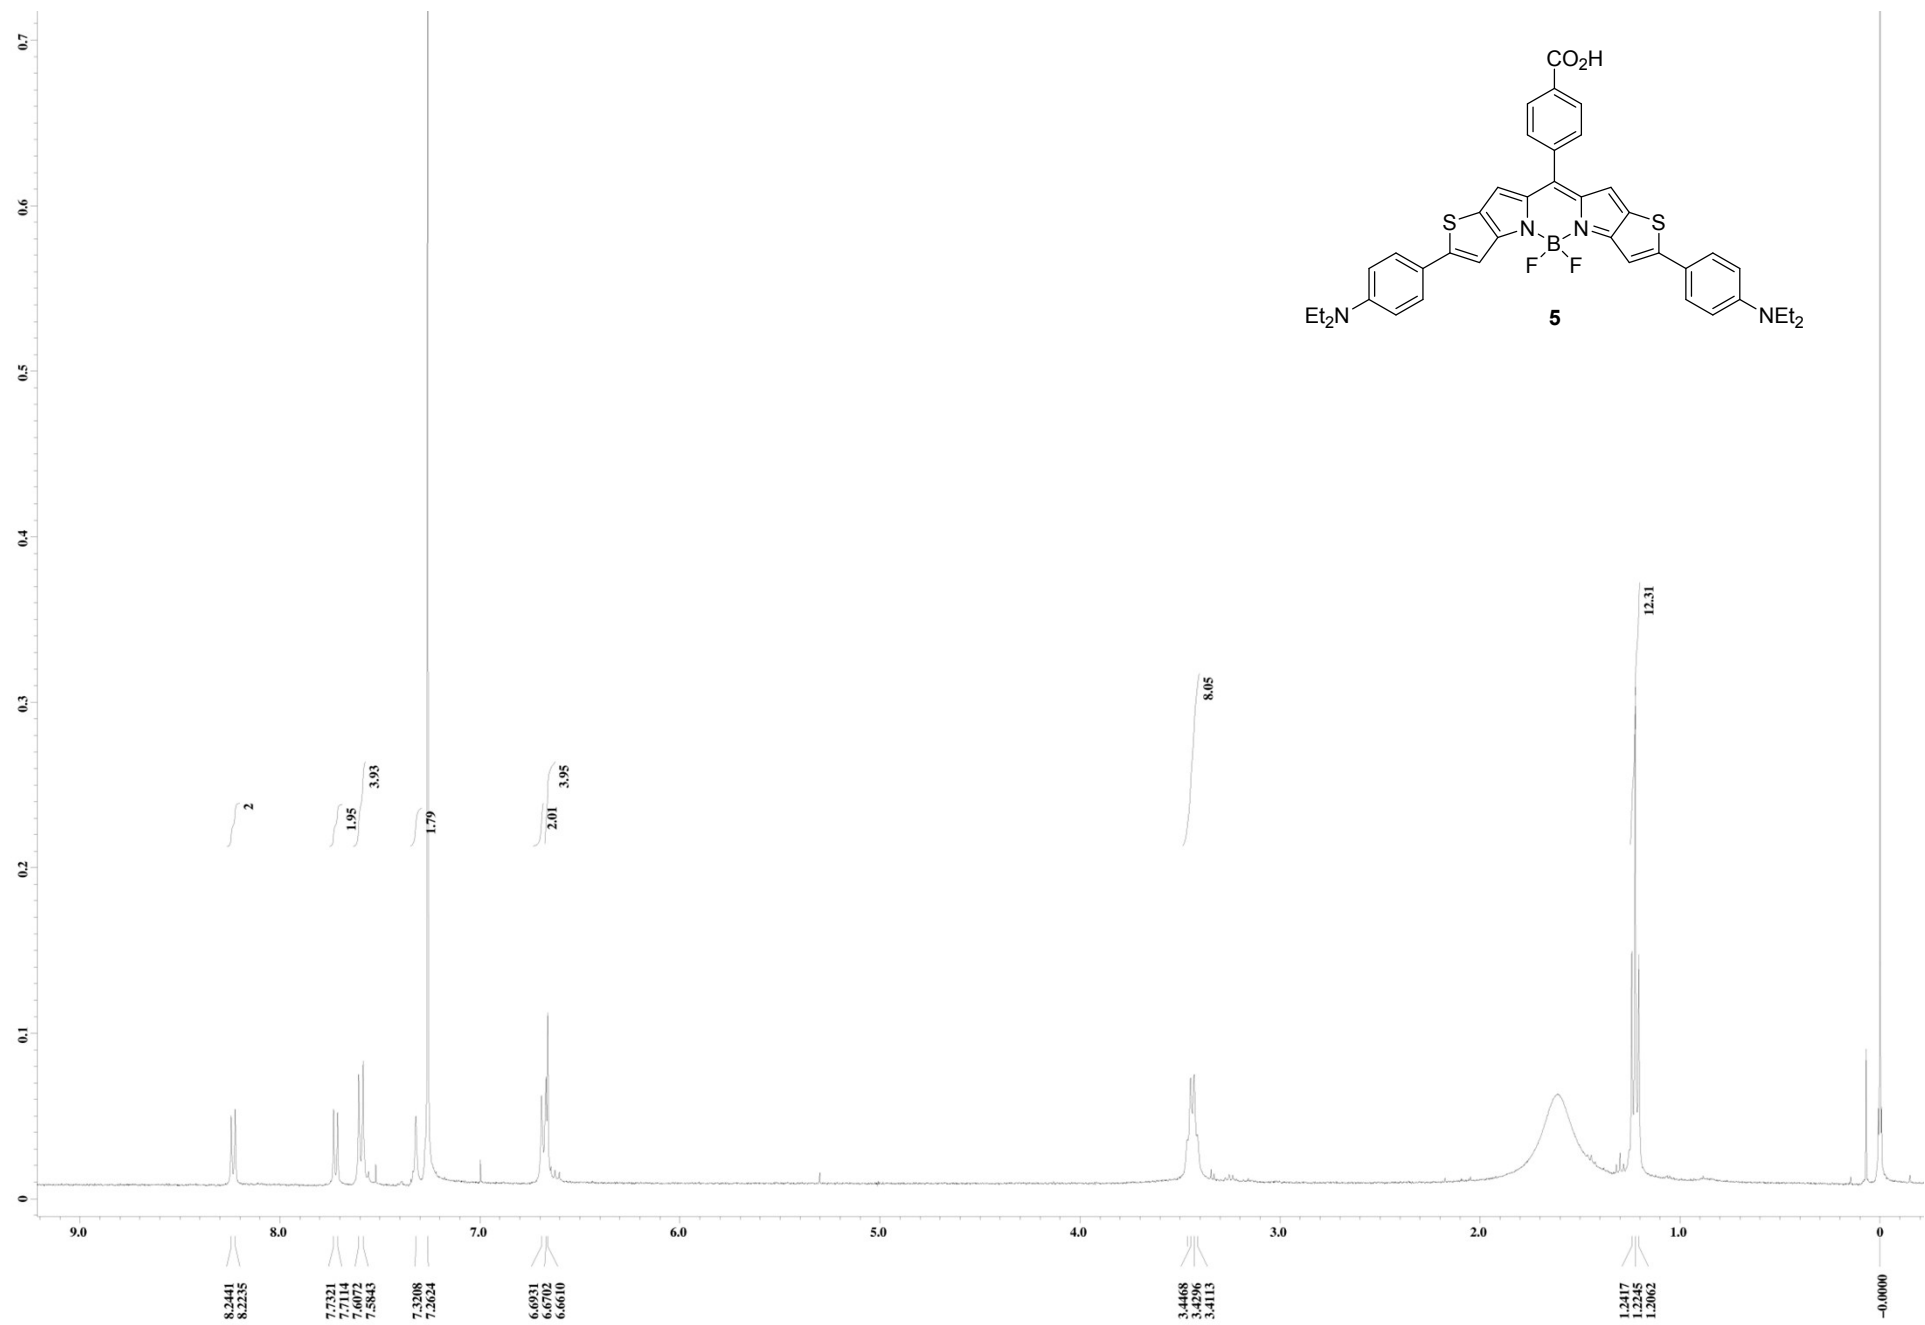

**Figure S8.** <sup>1</sup>H NMR spectrum of **5** (400 MHz, CDCl<sub>3</sub>).

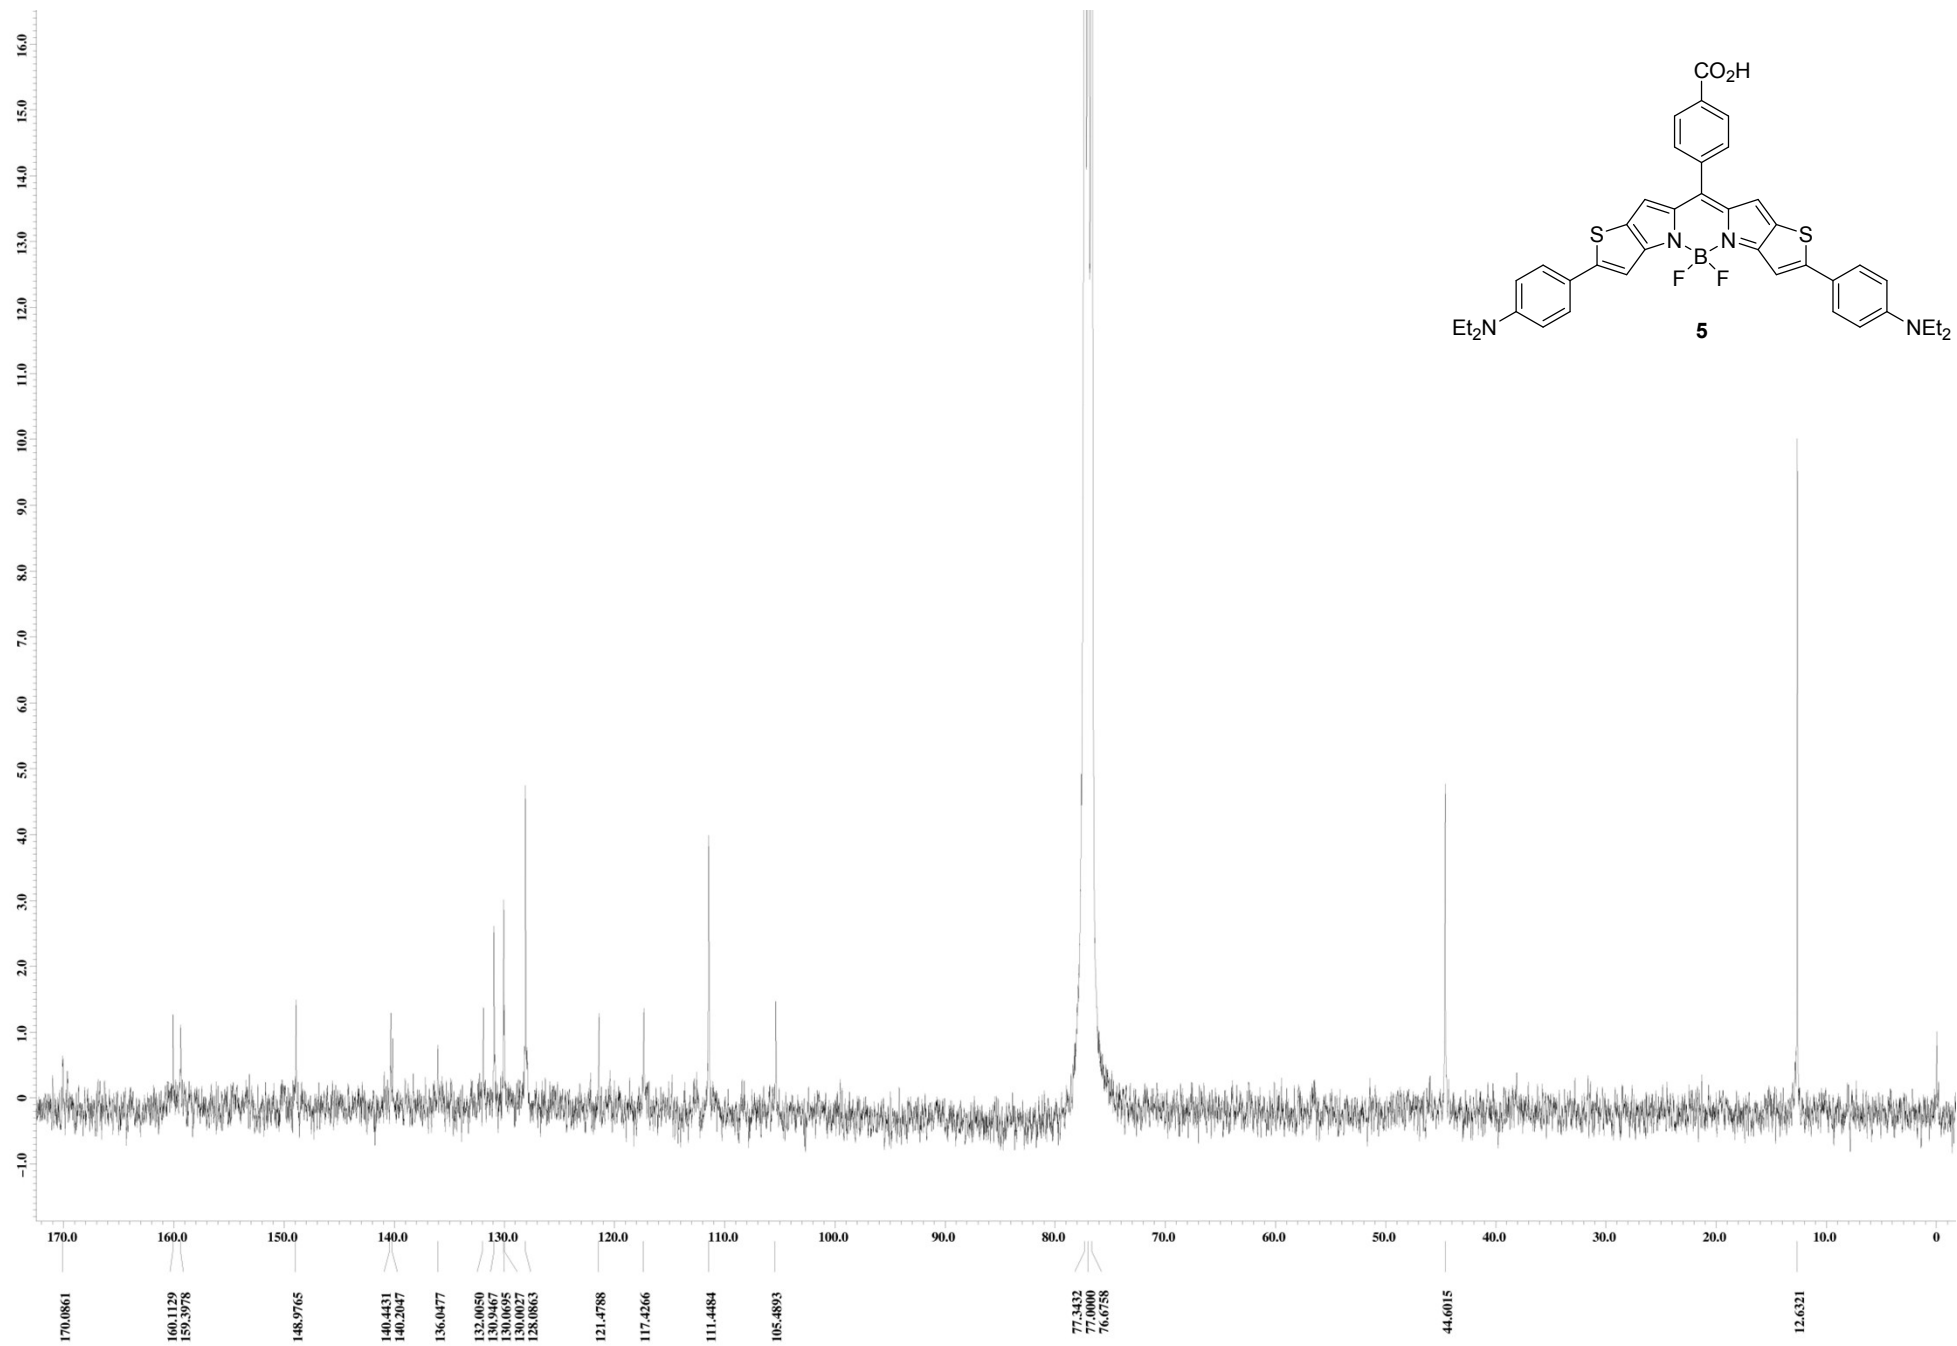

Figure S9. <sup>13</sup>C NMR spectrum of **5** (100 MHz, CDCl<sub>3</sub>).



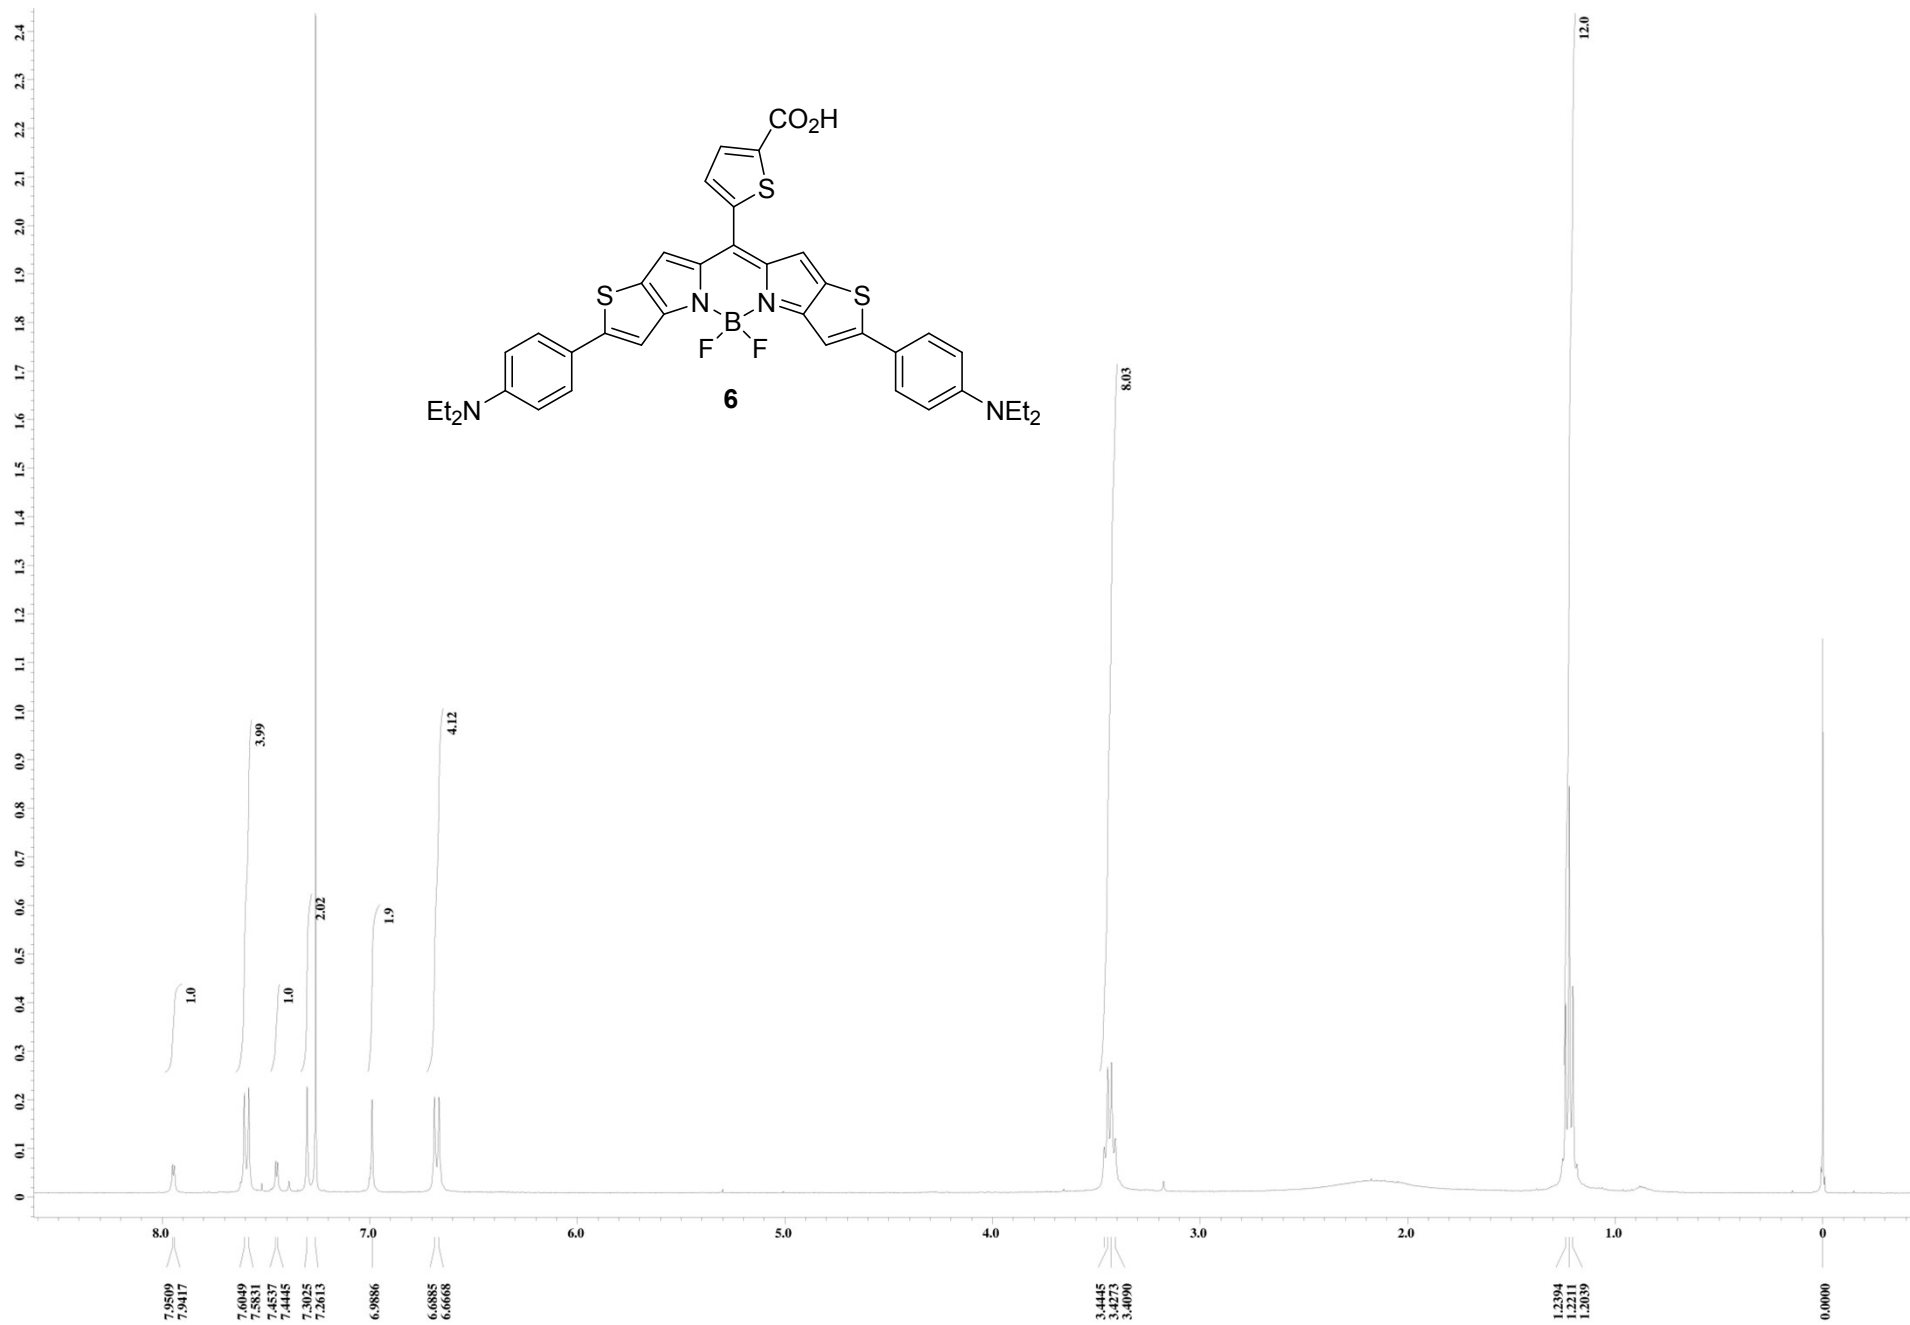

**Figure S10.** <sup>1</sup>H NMR spectrum of **6** (400 MHz, CDCl<sub>3</sub>).

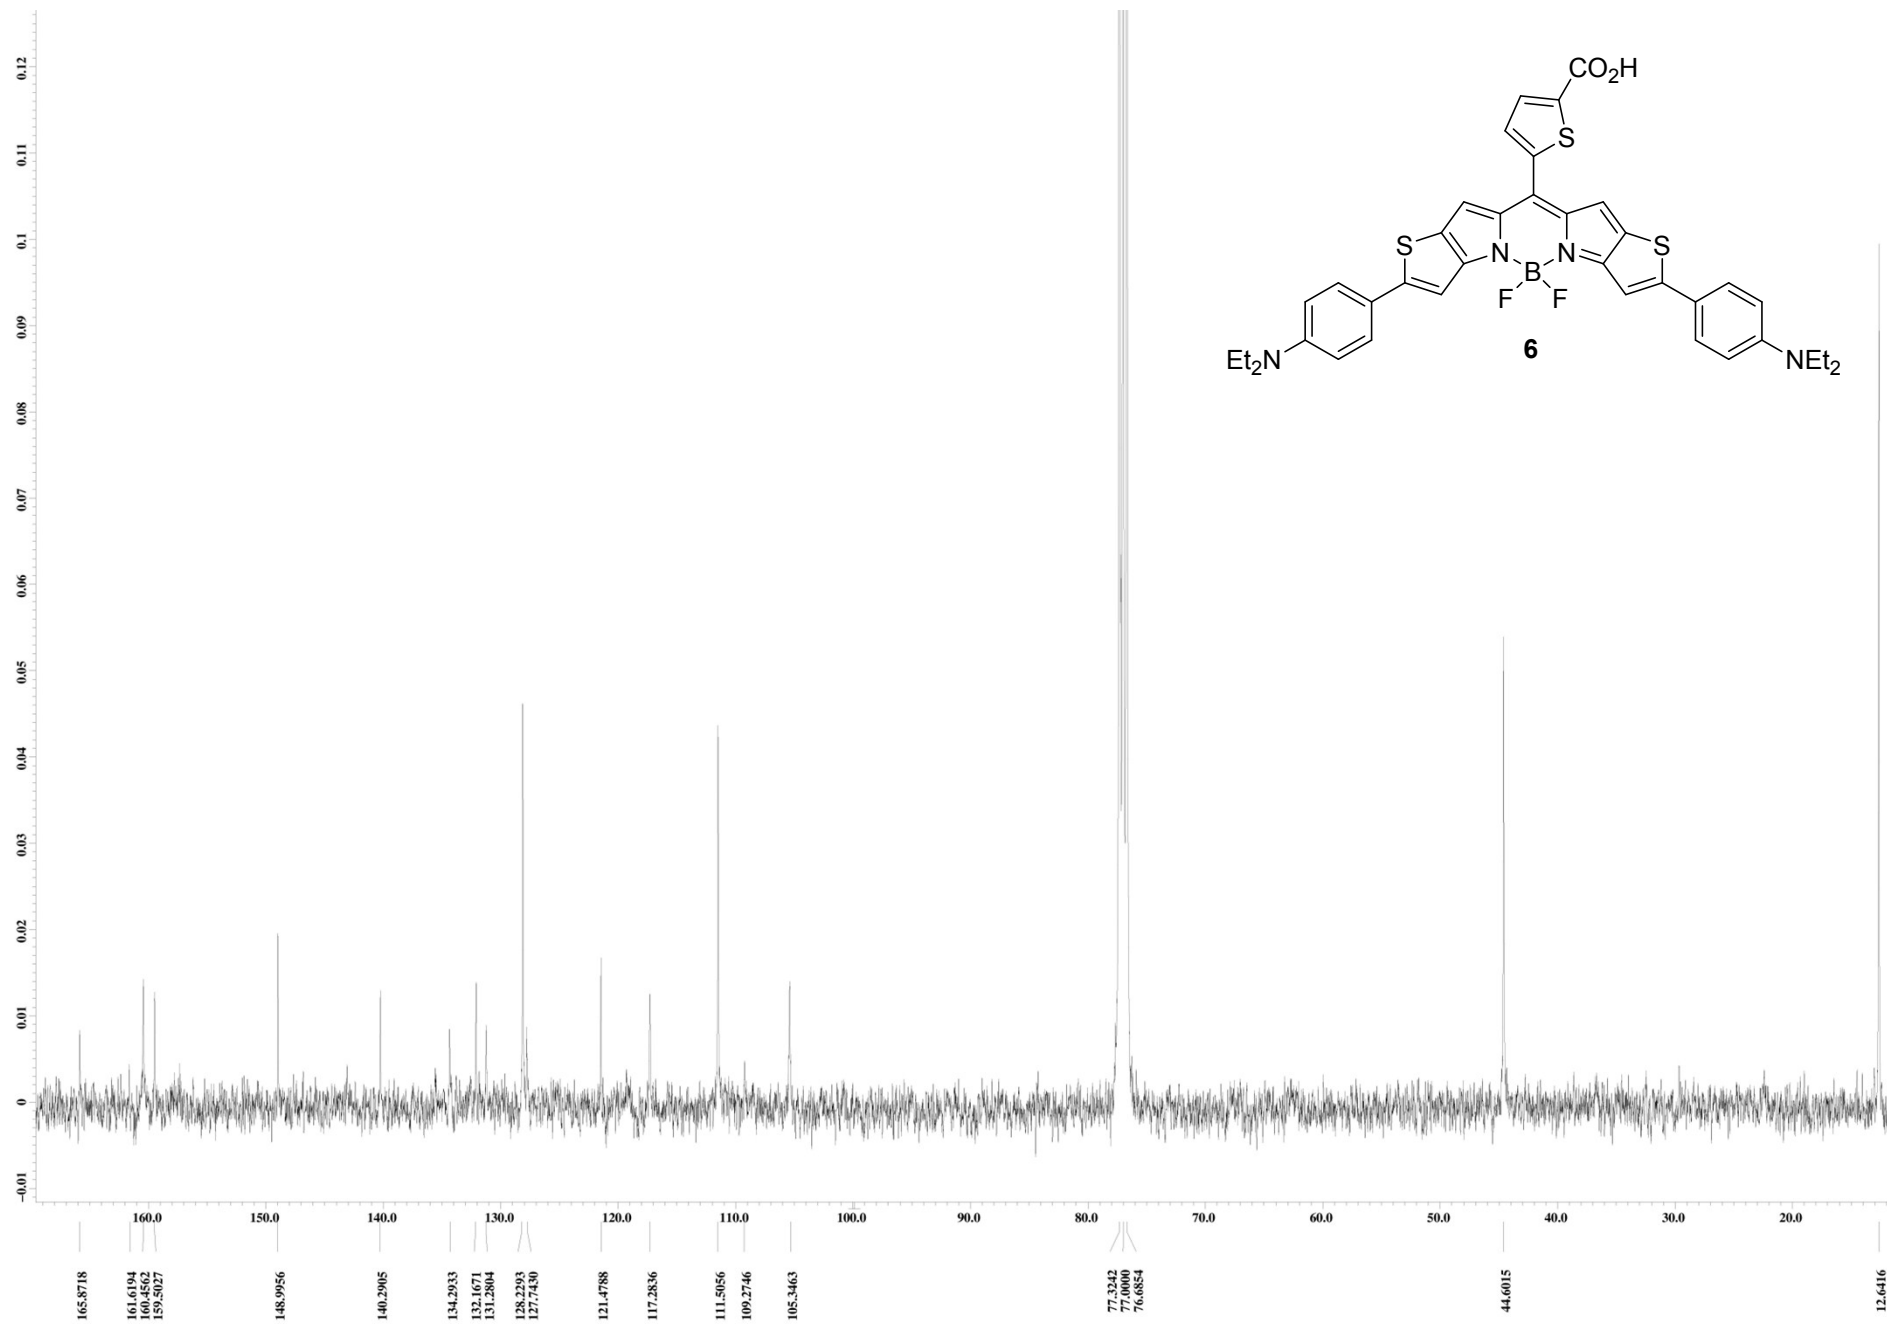

Figure S11.  $^{13}\text{C}$  NMR spectrum of **6** (100 MHz,  $\text{CDCl}_3$ ).
